# Supplementary material
Source: PubMed Central journal article supplement (PMC2954258)

## Supplemental Figures

**S1:** p38 docking sites. Sequence alignment reveals p38 docking sites (underlined) in known p38 MAPK substrates and Siah2.

**S2:** UV-irradiation attenuates Siah2-mediated degradation of PHD3. 293T cells were transfected with Siah2-HA and PHD3-Flag. 48 h later cells were mock or UV treated ( $40\text{J}/\text{m}^2$ ) and harvested at the indicated time points (h). Cell lysates were then subjected to immunoblotting with anti-Flag, anti-HA, or anti- $\beta$  actin antibodies.

**S3:** UV-irradiation increases PHD3 stability, which is attenuated by Siah2. Experiment was performed as detailed in S2 and analysis was carried out with the indicated antibodies.

**S4:** Inhibition of p38 does not affect degree of Siah2-mediated degradation of PHD3. 293T cells were transfected with Siah2-HA, p38 MAPK-ASP-Flag (dominant negative) and PHD3-Flag. 48 h later cells were either mock or UV-treated ( $40\text{J}/\text{m}^2$ ) and harvested after 1h. Cell lysates were then subjected to immunoblotting and probed with anti-Flag, anti-HA, or anti- $\beta$  actin antibodies.

**S5:** UV-irradiation induces Siah2 dependent degradation of TRAF2. Experiment was performed as detailed in S2 except TRAF2 was transfected instead of PHD3; analysis was carried out with the indicated antibodies.

S-1

p38 MAPK  
Substrates

CL100/MKP1  
MKP2  
PAC1  
MKP-5  
MNK1  
MKK7  
MSK2  
MK5  
PRAK  
(mouse)Siah2  
(human)Siah2  
(Xenopus)Siah2  
(human) Siah1

p38 docking sites (underlined)

RESTIVRRRAKGAKAGA  
RCNTIVRRRAKGASVLSLE  
PWNALLRRRAARGGPP  
CADKISRRRLQGGKITV  
MKLSPPCKSRLARRRALAQA  
EARRRIDLNLDISP  
FNRGKREGFFLKSVENAPLAKRRKQKL  
IQDLKVSLKPLHSVNNPILRKRKLLGK  
KPLHSVNNPALRKRKLLG  
RKQAENFAYRLELNGNRRRLTW  
RKQAENFAYRLELNGNRRRLTW  
RKQAENYAYRLELNGNRRRLTW  
RKQAENFAYRLELNGHRRRLTW

S-2

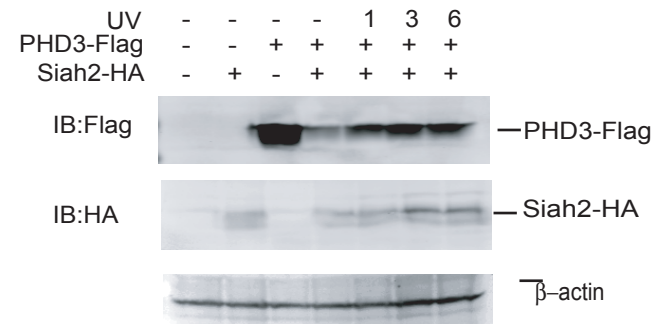

S-3

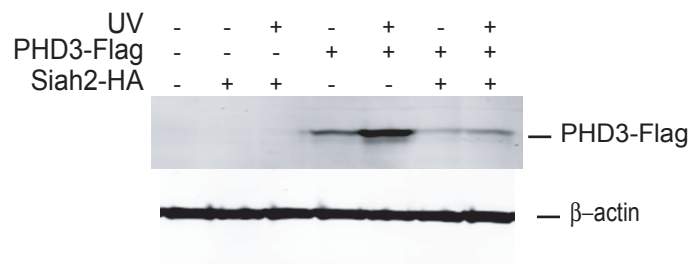

S-4

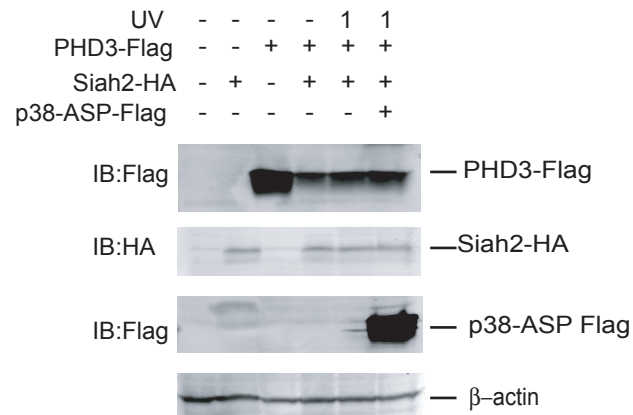

S-5

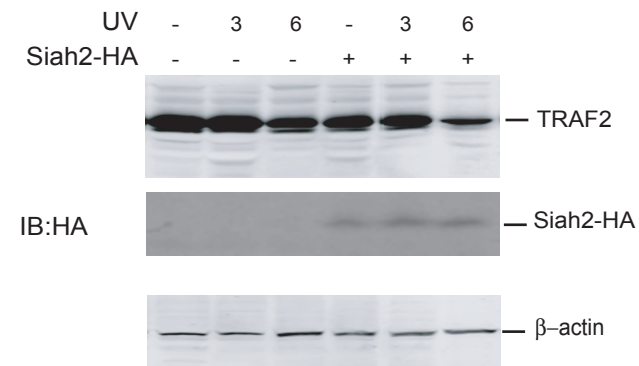

Supplement: NIHMS170807-supplement-supplemental_data.pdf [file NIHMS170807-supplement-supplemental_data.pdf]
